# Supplementary material for: Genomic organisation of the Mal d 1 gene cluster on linkage group 16 in apple
Source: PubMed Central journal article supplement — Mol Breed. 2011 Jun 24;29(3):759–78. doi: 10.1007/s11032-011-9588-4 (PMC3285766; doi:10.1007/s11032-011-9588-4), 2011-06-24
Supplement: 11032_2011_9588_MOESM1_ESM.pdf [file 11032_2011_9588_MOESM1_ESM.pdf]

|                   | Primer names | Sequence (5'-3')           | Ta (°C) | Product (bp)          |
|-------------------|--------------|----------------------------|---------|-----------------------|
| <b>Subfam I</b>   | Md1-1For     | TGTCAAACTATTACAGCGCTAGTGG  | 60      | 176                   |
|                   | Md1-1Rev     | CTTCAATCAAAGTGTAGGCGTATGA  |         |                       |
| <b>Subfam II</b>  | Md1-2For     | CGAAGGCGATGGAGGTGT         | 60      | 315                   |
|                   | Md1-2Rev     | GATCCTCCATCAGGAGATGC       |         |                       |
| <b>Subfam III</b> | Md1-3For     | GCTCCACAAGCAGTCAAACT       | 57      | 232                   |
|                   | Md1-3Rev     | TTCACTCCCTGTCAAATGAAAA     |         |                       |
| <b>Subfam IV</b>  | Md1-4For     | TCAACTTTGGTGAAGGTAGCACA    | 60      | 198                   |
|                   | Md1-4Rev     | TGGTGTGGTAGTGGCTGGTA       |         |                       |
| <b>Generic*</b>   | Md1-5For     | GTACAATGCCTTTGTTCTTGATG    | 57      | 375; 471; 489;<br>528 |
|                   | Md1-5Rev     | TCTTTGCCAGCCTTGACATGCTCTTC |         |                       |

\*The generic primer pair gave different product lengths due to the different intron lengths of isoallergens genes belonging to different subfamilies
