# Supplementary material for: Genomic organisation of the Mal d 1 gene cluster on linkage group 16 in apple
Source: PubMed Central journal article supplement — Mol Breed. 2011 Jun 24;29(3):759–78. doi: 10.1007/s11032-011-9588-4 (PMC3285766; doi:10.1007/s11032-011-9588-4), 2011-06-24
Supplement: 11032_2011_9588_MOESM2_ESM.pdf [file 11032_2011_9588_MOESM2_ESM.pdf]

| Isoallergen gene [ID] <sup>a</sup>                                   | Sequence (5'-3') <sup>b</sup>   | Start (bp) | Product (bp) <sup>c</sup> | Tm (C°) |
|----------------------------------------------------------------------|---------------------------------|------------|---------------------------|---------|
| <b>Mal d 1.01</b><br>[AY789236]                                      | F- T GACTCGATTGACGAAGCAAG       | 384        | 166                       | 54      |
|                                                                      | R- TTCAATGTTTCCCTTGGTGAGA       | 526        |                           |         |
| <b>Mal d 1.02</b><br>[AY827660]                                      | F- GCCCTGGAACCATCAAGAAT         | 149        | 419                       | 51      |
|                                                                      | R- GTGCTCTTCCTTGATCTACCCAT      | 545        |                           |         |
| <b>Mal d 1.03A-F<sup>d</sup></b><br>[AY789263/64/66;<br>AY822726/29] | F- CTGACAACCTCATCCCCAAGA        | 80         | 380                       | 54      |
|                                                                      | R- GTGTGGTAGTGGCTGGTGGT         | 346        |                           |         |
| <b>Mal d 1.04</b><br>[AY789242]                                      | F- TAATTCATTTGCAGGCGGC          | 282        | 159                       | 54      |
|                                                                      | R- TCAGGAGATGCGATCAATTTG        | 420        |                           |         |
| <b>Mal d 1.05</b><br>[AY789247]                                      | F- TTGATGGTGATAACCTCATCCTG      | 74         | 358                       | 52      |
|                                                                      | R- TTTGGTCTCATAAGCGATCTTCTC     | 408        |                           |         |
| <b>Mal d .06A</b><br>[AM283501]                                      | F- CGAAACCGAATACGCCTAAA         | 18         | 387                       | 54      |
|                                                                      | R- GCATCCCCTTCAATCAAGCTATAGC    | 390        |                           |         |
| <b>Mal d 1.06B</b><br>[AY789251]                                     | F- ATTTTCTCCATTAACCTGGTAATCTTT  | 203        | 183                       | 54      |
|                                                                      | R- CTTTGTCAATTCCTCAACCTT        | 364        |                           |         |
| <b>Mal d 1.06C</b><br>[AY789256]                                     | F- TCAACTATTTTCTCCATTAACCTTGCT  | 197        | 249                       | 54      |
|                                                                      | R- CCAACTTAATCTCATAAGAGATCTCCTG | 417        |                           |         |
| <b>Mal d 1.07</b><br>[AY789257/58]                                   | F- CAACTTTGTGTACCAATACAGTCTC    | 234        | 138                       | 51      |
|                                                                      | R- CTTTGGTATGGTAGTGGGTGA        | 350        |                           |         |
| <b>Mal d 1.08</b><br>[AY789259-61]                                   | F- CGACTGCTCTTGATGGTGATG        | 65         | 343                       | 51      |
|                                                                      | R- CTAGCCTTGAGATGCTCTTCAGTA     | 384        |                           |         |
| <b>Mal d 1.09</b><br>[AY822720/21]                                   | F- GAGCTGGAACCATATGAAGATTAG     | 149        | 200                       | 54      |
|                                                                      | R- GCGCTTGATGATCGAAC TGT        | 329        |                           |         |

<sup>a</sup>GenBank ID numbers of the sequences on which the primers were designed; <sup>b</sup>Bold and italicized nucleotides in the primer sequences are deliberate mis-matches introduced to increase specificity (Gao et al. 2005); <sup>c</sup>From the ATG-codon; <sup>d</sup>General primer pair for all *Mal d 1.03* isoallergens
