# Supplementary material for: Genomic organisation of the Mal d 1 gene cluster on linkage group 16 in apple
Source: PubMed Central journal article supplement — Mol Breed. 2011 Jun 24;29(3):759–78. doi: 10.1007/s11032-011-9588-4 (PMC3285766; doi:10.1007/s11032-011-9588-4), 2011-06-24
Supplement: 11032_2011_9588_MOESM3_ESM.pdf [file 11032_2011_9588_MOESM3_ESM.pdf]

| BAC clone    | Contig | Primer name   | Primer sequence (5'-3') |
|--------------|--------|---------------|-------------------------|
| <b>MC-12</b> | C1     | 1-MC12-C1For  | AGCAGAAATGCTTCGTCGTT    |
|              | C2     | 2-MC12-C2Rev  | AGGGGAGGTTATGCC AAAAT   |
|              |        | 3-MC12-C2For  | GCTAGTTCAGGTCGGGATTC    |
|              | C3     | 4-MC12-C3Rev  | TCCTGGAATGGAAACACCTT    |
|              |        | 5-MC12-C3For  | AATGCCAAGGCTTCAAGAT     |
|              | C4     | 6-MC12-C4Rev  | GATTGGGATATGACCGTTGG    |
| <b>MC-20</b> | C1     | 7-MC20-C1For  | TAATGTGGGCGATTGGGTAT    |
|              | C2     | 8-MC20-C2Rev  | TCCTTTGAGTTTTCCACCTGTT  |
|              |        | 9-MC20-C2For  | CAGAACATGTTTGC GTTGAA   |
|              | C3     | 10-MC20-C3Rev | CCGAAATCCCACAATCAAA     |
|              |        | 11-MC20-C3For | CTGTGAGGGCTTTGGATAGG    |
|              | C4     | 12-MC20-C4For | CATCGGTTTGCTACTGCTCA    |
