# Supplementary material for: Genomic organisation of the Mal d 1 gene cluster on linkage group 16 in apple
Source: PubMed Central journal article supplement — Mol Breed. 2011 Jun 24;29(3):759–78. doi: 10.1007/s11032-011-9588-4 (PMC3285766; doi:10.1007/s11032-011-9588-4), 2011-06-24
Supplement: 11032_2011_9588_MOESM4_ESM.pdf [file 11032_2011_9588_MOESM4_ESM.pdf]

| BAC clone        | Primers name               | Primers sequence (5'-3') | Position (nt) <sup>1</sup> | Ta (°C) | Segregation in DuXFi population <sup>2</sup> |
|------------------|----------------------------|--------------------------|----------------------------|---------|----------------------------------------------|
| MC-12            | MC-12SSR384For             | CCTAAATCCTCCCTCCCCAAAC   | 10.083-10.248              | 60      | NO                                           |
|                  | MC-12SSR384Rev             | AGATCGGACGTTGGTGTAGG     |                            |         |                                              |
|                  | MC-12SSRC744Afor           | TCAACATCCAAATCCCACAA     | 49.406-49.612              | 57      | YES                                          |
|                  | MC-12SSRC744Arev           | GGTGTCTTTGAGCCTCCTG      |                            |         |                                              |
|                  | MC-12SSRC744Bfor           | CCAAATCCACCCCTAGTTTG     | 78.221-78.418              | 57      | YES                                          |
|                  | MC-12SSRC744Brev           | CATACGTTCTCCACCGACT      |                            |         |                                              |
| MC-12SSRC744Cfor | CCTGACACAACCCGATAACC       | 102.343-102.529          | 60                         | NO      |                                              |
| MC-12SSRC744Crev | TCCAATGGTCACCAATTTTT       |                          |                            |         |                                              |
| MC-20            | MC-12SSR316For             | CCGTGATTCTTTTGGGGATA     | 115.950-116.110            | 60      | YES                                          |
|                  | MC-12SSR316Rev             | CATTACAACGAGGAGCAGCA     |                            |         |                                              |
|                  | MC-20SSR96C1aFor           | TTTGCAAAGGATGGATTGACT    | 5.841-6.048                | 60      | YES                                          |
|                  | MC-20SSR96C1aRev           | GCAATGGCGTTCTAGGATTC     |                            |         |                                              |
|                  | MC-20SSRC1For              | AATCGGAGTTGAATCGGTTG     | 14.888-15.154              | 60      | NO                                           |
|                  | MC-20SSRC1Rev              | CaGTTGTGAGCTTCGAAGAATG   |                            |         |                                              |
| MC-20SSR96C3for  | AGGGTGAGGATTGGATGTTG       | 40.986-41.169            | 60                         | NO      |                                              |
| MC-20SSR96C3rev  | TCGTTCTCGGGATaGGTGTGTC     |                          |                            |         |                                              |
| MC-20SSR96C2For  | AATCCATGTTGGGAGACAGG       | 114.473-114.671          | 60                         | YES     |                                              |
| MC-20SSR96C2Rev  | TGT GGT CGA CGA TGA TCC TA |                          |                            |         |                                              |
| MC-20SSRC4For    | GTGCGACTGTTTCTGTGTGC       | 127.180-127.365          | 60                         | YES     |                                              |
| MC-20SSRC4Rev    | TCATTCAAAGACGGCAACAA       |                          |                            |         |                                              |

<sup>1</sup>Positions count from the T7-End of Florina BAC clones sequences

<sup>2</sup>All the SSRs resulted polymorphic in Durello di Forli
