# Supplementary material for: Genomic organisation of the Mal d 1 gene cluster on linkage group 16 in apple
Source: PubMed Central journal article supplement — Mol Breed. 2011 Jun 24;29(3):759–78. doi: 10.1007/s11032-011-9588-4 (PMC3285766; doi:10.1007/s11032-011-9588-4), 2011-06-24
Supplement: 11032_2011_9588_MOESM7_ESM.pdf [file 11032_2011_9588_MOESM7_ESM.pdf]

| Malus domestica gbrowse analysis on LG16 |               |                    |                        |               | BLASTP results                   |                          |                                                                                                        | BLASTN results |                          |                                         |            |           |                                                                                                                                                                                                            |                                              |                                   |
|------------------------------------------|---------------|--------------------|------------------------|---------------|----------------------------------|--------------------------|--------------------------------------------------------------------------------------------------------|----------------|--------------------------|-----------------------------------------|------------|-----------|------------------------------------------------------------------------------------------------------------------------------------------------------------------------------------------------------------|----------------------------------------------|-----------------------------------|
| ORF                                      | Gene name     | Gene position      | Direction <sup>1</sup> | Contig name   | Contig position on chromosome 16 | Most similar sequence ID | Description                                                                                            | E-value        | Most similar sequence ID | Description                             | SNP in CDS | E-value   | Mal d 1 locus                                                                                                                                                                                              | Corresponding ORF in Flotina BACs            | Nomenclature in Yang et al., 2011 |
| CH05a04                                  |               |                    |                        |               | MDC003086.270                    | 892700..896767           |                                                                                                        |                |                          |                                         |            |           |                                                                                                                                                                                                            |                                              |                                   |
| GD-ORF1                                  | MDP0000399350 | 10737669..10738272 | ↑                      | MDC012403.580 | 10733976..10745025               | CBL94134                 | putative Mal d 1.06A isoallergen                                                                       | 2.00E-83       | AY827703                 | Mal d 1.06A.03.01                       | 0          | 0.0       | Mal d 1.06A                                                                                                                                                                                                | ORF6                                         | absent                            |
| MC-12 Sp6 End                            |               |                    |                        |               |                                  |                          |                                                                                                        |                |                          |                                         |            |           |                                                                                                                                                                                                            |                                              |                                   |
| Contig gap                               |               |                    |                        |               |                                  |                          |                                                                                                        |                |                          |                                         |            |           |                                                                                                                                                                                                            |                                              |                                   |
| GD-ORF2                                  | MDP0000942514 | 10753144..10753344 | ↑                      | MDC012384.247 | 10753008..10771737               | CBL94138                 | putative Mal d 1.10 isoallergen                                                                        | 1.00E-36       | FN823234                 | Mal d 1.1001                            | 2          | 1.00E-99  | Mal d 1.10                                                                                                                                                                                                 | ORF10, partial (exon II)                     | absent                            |
| GD-ORF3                                  | MDP0000942516 | 10767444..10768094 | ↑                      | MDC012384.247 | 10753008..10771737               | CBL94141                 | putative Mal d 1.02 isoallergen                                                                        | 1.00E-85       | AY827656                 | Mal d 1.0201.04                         | 0          | 0.0       | Mal d 1.02                                                                                                                                                                                                 | ORF13                                        | Mal d 1.02                        |
| GD-ORF4                                  | MDP0000196487 | 10760110..10760891 | ↑                      | MDC012384.247 | 10753008..10771737               | CBL94145                 | putative Mal d 1.12 isoallergen                                                                        | 2.00E-74       | FN823234                 | Mal d 1.1201                            | 5          | 3.00E-156 | Mal d 1.12                                                                                                                                                                                                 | ORF17                                        | absent                            |
| GD-ORF5                                  | MDP0000197252 | 10772669..10773259 | ↑                      | MDC013442.401 | 10767880..10774262               | CBL94145                 | putative Mal d 1.12 isoallergen                                                                        | 3.00E-78       | FN823234                 | Mal d 1.1201                            | 0          | 0.0       | Mal d 1.12                                                                                                                                                                                                 | ORF17, gap of 45 bp                          | absent                            |
| GD-ORF6                                  | MDP0000101911 | 10789840..10789841 | ↑                      | MDC013442.313 | 10789806..10782809               | CBL94148                 | putative Mal d 1.11 isoallergen                                                                        | 7.00E-92       | FN823234                 | Mal d 1.1101                            | 0          | 0.0       | Mal d 1.11                                                                                                                                                                                                 | ORF20                                        | absent                            |
| GD-ORF7                                  | MDP0000789174 | 10791065..10791179 | ↑                      | MDC012636.208 | 10789541..10800326               | CBL94148                 | putative Mal d 1.11 isoallergen                                                                        | 7.00E-92       | FN823234                 | Mal d 1.1101                            | 0          | 0.0       | Mal d 1.11                                                                                                                                                                                                 | ORF20                                        | absent                            |
| MC-12 Sp6 End                            |               |                    |                        |               |                                  |                          |                                                                                                        |                |                          |                                         |            |           |                                                                                                                                                                                                            |                                              |                                   |
| Contig gap                               |               |                    |                        |               |                                  |                          |                                                                                                        |                |                          |                                         |            |           |                                                                                                                                                                                                            |                                              |                                   |
| GD-ORF8                                  | MDP0000216906 | 10801484..10801777 | ↑                      | MDC003056.321 | 10796110..10810077               | AAX20989                 | Mal d 1.06C04                                                                                          | 8.00E-42       | FN823234                 | Mal d 1ps2 pseudogene                   | 0          | 2.00E-150 | Mal d 1ps3                                                                                                                                                                                                 | ORF25, pseudogene                            | absent                            |
| GD-ORF9                                  | MDP0000216907 | 10805767..10806399 | ↑                      | MDC003056.321 | 10796110..10810077               | CBL94151                 | putative Mal d 1.06B isoallergen                                                                       | 3.00E-83       | AY827716                 | Mal d 1.06B05.02                        | 3          | 0.0       | Mal d 1.06B                                                                                                                                                                                                | ORF23                                        | Mal d 1.06B                       |
| GD-ORF10                                 | MDP0000122064 | 10808145..10809328 | ↑                      | MDC012403.573 | 10807573..10811474               | BAJ11954                 | Mal d 1.06B                                                                                            | 2.00E-160      |                          |                                         |            |           |                                                                                                                                                                                                            |                                              |                                   |
| GD-ORF11                                 | MDP0000151113 | 10815185..10817248 | ↑                      | MDC014177.202 | 10811474..10849046               | dbjBAE99683              | oxidoreductase like protein                                                                            | 4.00E-27       |                          |                                         |            |           |                                                                                                                                                                                                            |                                              |                                   |
| GD-ORF12                                 | MDP0000151118 | 10842863..10843862 | ↑                      | MDC014177.202 | 10811474..10849046               | ABJ30321                 | inositol phosphate kinase                                                                              | 1.00E-137      |                          |                                         |            |           |                                                                                                                                                                                                            |                                              |                                   |
| GD-ORF13                                 | MDP0000910638 | 10879414..10880761 | ↑                      | MDC022482.156 | 10862235..10888654               | BAC75671                 | transcription factor MYB101                                                                            | 5.00E-62       |                          |                                         |            |           |                                                                                                                                                                                                            |                                              |                                   |
| Contig gap                               |               |                    |                        |               |                                  |                          |                                                                                                        |                |                          |                                         |            |           |                                                                                                                                                                                                            |                                              |                                   |
| GD-ORF14                                 | MDP0000258746 | 11054048..11054825 | ↓                      | MDC009119.487 | 11053823..11058752               | XP_002531787             | Glycerol-3-phosphate transporter, putative                                                             | 8.00E-59       |                          |                                         |            |           |                                                                                                                                                                                                            |                                              |                                   |
| GD-ORF15                                 | MDP0000329942 | 11070760..11071020 | ↓                      | MDC003466.686 | 11066682..11073239               | YP_04021721              | ribosomal protein S15                                                                                  | 4.00E-42       |                          |                                         |            |           |                                                                                                                                                                                                            |                                              |                                   |
| Contig gap                               |               |                    |                        |               |                                  |                          |                                                                                                        |                |                          |                                         |            |           |                                                                                                                                                                                                            |                                              |                                   |
| GD-ORF16                                 | MDP0000058403 | 11131427..11136795 | ↑                      | MDC018179.210 | 11129614..11143912               | XP_002547414             | hypothetical protein                                                                                   | 2.00E-172      |                          |                                         |            |           |                                                                                                                                                                                                            |                                              |                                   |
| GD-ORF17                                 | MDP0000128092 | 11181509..11187055 | ↑                      | MDC016215.185 | 11170521..11190953               | ADL3668                  | GATA domain class transcription factor                                                                 | 0.0            |                          |                                         |            |           |                                                                                                                                                                                                            |                                              |                                   |
| MC-20 Sp6 End                            |               |                    |                        |               |                                  |                          |                                                                                                        |                |                          |                                         |            |           |                                                                                                                                                                                                            |                                              |                                   |
| Contig gap                               |               |                    |                        |               |                                  |                          |                                                                                                        |                |                          |                                         |            |           |                                                                                                                                                                                                            |                                              |                                   |
| GD-ORF18                                 | MDP0000290818 | 11207635..11210754 | ↓                      | MDC010650.585 | 11186478..11226800               | CBL94183                 | putative type-b response regulator (sensor histidine kinase)                                           | 0.0            |                          |                                         |            |           |                                                                                                                                                                                                            | ORF55                                        |                                   |
| GD-ORF19                                 | MDP0000290819 | 11212662..11215416 | ↑                      | MDC010650.585 | 11186478..11226800               | CBL94184                 | putative COBL7 (COBRA-LIKE 7)                                                                          | 0.0            |                          |                                         |            |           |                                                                                                                                                                                                            | ORF56                                        |                                   |
| GD-ORF20                                 | MDP0000120300 | 11242410..11244614 | ↑                      | MDC004233.457 | 11242847..11272017               | CBL94180                 | Conserved hypothetical protein with drought induced 19 protein (DI19) domain                           | 2.00E-90       |                          |                                         |            |           |                                                                                                                                                                                                            | ORF52                                        |                                   |
| GD-ORF21                                 | MDP0000307900 | 11247889..11250676 | ↑                      | MDC017486.371 | 11242847..11272017               | CBL94179                 | Hypothetical protein with DUF789; conserved domain found in several plant proteins of unknown function |                |                          |                                         |            |           |                                                                                                                                                                                                            | ORF52                                        |                                   |
| GD-ORF22                                 | MDP0000864747 | 11248648..11250127 | ↑                      | MDC017486.371 | 11242847..11272017               | CBL94174                 | putative Mal d 1.07 isoallergen                                                                        | 5.00E-85       | AY822717                 | Mal d 1.0701                            | 0          | 0.0       | Mal d 1.07                                                                                                                                                                                                 | ORF46                                        | Mal d 1.07                        |
| GD-ORF23                                 | MDP0000142814 | 11250682..11251161 | ↑                      | MDC017486.371 | 11242847..11272017               | CBL94177                 | putative Mal d 1.08 isoallergen                                                                        | 8.00E-87       | AY822718                 | Mal d 1.0801.01                         | 0          | 0.0       | Mal d 1.08                                                                                                                                                                                                 | ORF49                                        | Mal d 1.08                        |
| GD-ORF24                                 | MDP0000864748 | 11251946..11252425 | ↑                      | MDC017486.371 | 11242847..11272017               | CBL94175                 | putative Mal d 1.09 isoallergen                                                                        | 6.00E-86       | AY822721                 | Mal d 1.0903                            | 0          | 0.0       | Mal d 1.09                                                                                                                                                                                                 | ORF47                                        | Mal d 1.09                        |
| GD-ORF25                                 | MDP0000197322 | 11259130..11260799 | ↑                      | MDC013119.235 | 11252528..11268799               | XP_002531219             | histone-lysine n-methyltransferase, suvH, putative                                                     | 0.0            |                          |                                         |            |           |                                                                                                                                                                                                            |                                              |                                   |
| GD-ORF26                                 | MDP0000174018 | 11263047..11263526 | ↑                      | MDC013119.235 | 11252528..11268799               | CBL94177                 | putative Mal d 1.08 isoallergen                                                                        | 8.00E-87       | AY822719                 | Mal d 1.0801.02                         | 0          | 0.0       | Mal d 1.08                                                                                                                                                                                                 | ORF49                                        | Mal d 1.08                        |
| GD-ORF27                                 | MDP0000174019 | 11266664..11269470 | ↑                      | MDC012689.443 | 11272527..11296236               | CBL94179                 | Conserved hypothetical protein                                                                         | 1.00E-136      |                          |                                         |            |           |                                                                                                                                                                                                            |                                              |                                   |
| GD-ORF28                                 | MDP0000875302 | 11275095..11276059 | ↑                      | MDC021689.443 | 11272527..11296236               | XP_002531220             | Major pollen allergen Ory s 1 precursor, putative (Expansin-like protein)                              | 1.00E-75       |                          | No significant similarities             |            |           |                                                                                                                                                                                                            |                                              | new apple allergen ?              |
| GD-ORF29                                 | MDP0000312569 | 11281899..11282378 | ↓                      | MDC015329.200 | 11276101..11282361               | CBL94173                 | putative Mal d 1.03G isoallergen                                                                       | 2.00E-83       | AY822733                 | Mal d 1.03G01                           | 0          | 0.0       | Mal d 1.03G                                                                                                                                                                                                | ORF45                                        | Mal d 1.03G                       |
| MC-20 T1 End                             |               |                    |                        |               |                                  |                          |                                                                                                        |                |                          |                                         |            |           |                                                                                                                                                                                                            |                                              |                                   |
| GD-ORF30                                 | MDP0000638667 | 11287535..11288646 | ↓                      | MDC016850.183 | 11287106..11289520               | XP_002264538             | hypothetical protein, Hy-III related family                                                            | 4.00E-113      |                          |                                         |            |           |                                                                                                                                                                                                            |                                              |                                   |
| GD-ORF31                                 | MDP0000157399 | 11288621..11300225 | ↓                      | MDC021689.437 | 11288343..11301838               | XP_002264538             | hypothetical protein, Hy-III related family                                                            | 4.00E-184      |                          |                                         |            |           |                                                                                                                                                                                                            |                                              |                                   |
| GD-ORF32                                 | MDP0000617435 | 11307267..11309382 | ↓                      | MDC010116.248 | 11305084..11312468               | XP_002264538             | hypothetical protein, Hy-III related family                                                            | 3.00E-165      |                          |                                         |            |           |                                                                                                                                                                                                            |                                              |                                   |
| GD-ORF33                                 | MDP0000868415 | 11313523..11316359 | ↓                      | MDC044024.5   | 11308897..11318098               | XP_002264538             | hypothetical protein, Hy-III related family                                                            | 6.00E-152      |                          |                                         |            |           |                                                                                                                                                                                                            |                                              |                                   |
| GD-ORF34                                 | MDP0000199982 | 11319610..11320908 | ↓                      | MDC012403.590 | 11317776..11324340               | XP_002272437             | hypothetical protein                                                                                   | 2.00E-60       |                          |                                         |            |           |                                                                                                                                                                                                            |                                              |                                   |
| GD-ORF35                                 | MDP0000288293 | 11340375..11341271 | ↑                      | MDC008788.391 | 11321059..11341473               | AAS00045                 | Mal d 1 like                                                                                           | 3.00E-84       | AY428581                 | Malus x domestica clone 1f Mal d 1 like | 0          | 0.0       | Mal d 1.06D 99.6% nucleotide similarity to Mal d 1.06A, but 1.06A of GD (Cao et al 2009) is actually present at a different location (LG16:10737669..10738272), due to which this must be a different gene | Missing in Flotina BAC sequences             | Mal d 1.06A                       |
| GD-ORF36                                 | MDP0000151829 | 11343444..11344406 | ↓                      | MDC012403.589 | 11341474..11351243               | CBL94138                 | putative Mal d 1.10 isoallergen                                                                        | 9.00E-86       | FN823234                 | Mal d 1.1001                            | 0          | 0.0       | Mal d 1.10                                                                                                                                                                                                 | ORF10                                        | Mal d 1.10                        |
| MC-12 T7 End                             |               |                    |                        |               |                                  |                          |                                                                                                        |                |                          |                                         |            |           |                                                                                                                                                                                                            |                                              |                                   |
| GD-ORF37                                 | MDP0000144838 | 11350987..11351199 | ↑                      | MDC021689.441 | 11350241..11358529               | CBL94134                 | putative Mal d 1.06A isoallergen                                                                       | 1.00E-31       | AY827703                 | Mal d 1.06A03.01                        | 0          | 0.0       | Mal d 1.06A                                                                                                                                                                                                | ORF6, partial (exon II)                      | absent                            |
| GD-ORF38                                 | MDP0000593385 | 11350286..11351353 | ↑                      | MDC021689.441 | 11350241..11358529               | CBL94129                 | putative reverse transcriptase (RNA-dependent DNA polymerase) domain containing protein                | 0.0            |                          |                                         |            |           |                                                                                                                                                                                                            | ORF1, partial (exon I)                       |                                   |
| GD-ORF39                                 | MDP0000593386 | 11351384..11353273 | ↑                      | MDC021689.441 | 11350241..11358529               | CAE01862                 | Putative retroelement pol polyprotein                                                                  | 4.00E-152      |                          |                                         |            |           |                                                                                                                                                                                                            |                                              |                                   |
| GD-ORF40                                 | MDP0000313454 | 11354205..11354798 | ↑                      | MDC021689.441 | 11350241..11358529               | AAX18292                 | major allergen Mal d 1.04                                                                              | 3.00E-85       | AY827664                 | Mal d 1.0404.02                         | 0          | 0.0       | Mal d 1.04                                                                                                                                                                                                 | Missing in Flotina BAC sequences             | Mal d 1.04                        |
| GD-ORF41                                 | MDP0000245051 | 11366759..11367052 | ↓                      | MDC020307.193 | 11363677..11367315               | CBL94138                 | putative Mal d 1.10 isoallergen                                                                        | 4.00E-27       | FN823234                 | Mal d 1.1001                            | 1          | 0.0       | Mal d 1.10                                                                                                                                                                                                 | ORF10, partial (exon I)                      | absent                            |
| Contig gap                               |               |                    |                        |               |                                  |                          |                                                                                                        |                |                          |                                         |            |           |                                                                                                                                                                                                            |                                              |                                   |
| GD-ORF42                                 | MDP0000116244 | 11433701..11434305 | ↓                      | MDC010239.242 | 11431490..11456921               | AAX18306                 | major allergen Mal d 1.06C                                                                             | 7.00E-82       | AY827725                 | Mal d 1.06C02.01                        | 1          | 0.0       | Mal d 1.06C                                                                                                                                                                                                | ORF28                                        | Mal d 1.06C                       |
| GD-ORF43                                 | MDP0000287647 | 11436376..11436747 | ↓                      | MDC010239.242 | 11431490..11456921               | AY827730                 | Mal d 1ps2.02                                                                                          | 1              | 0.0                      | Mal d 1ps2.02                           | 1          | 0.0       | Mal d 1ps2                                                                                                                                                                                                 | ORF29, pseudogene identical to MDP0000840722 | absent                            |
| MC-12 Sp6 End                            |               |                    |                        |               |                                  |                          |                                                                                                        |                |                          |                                         |            |           |                                                                                                                                                                                                            |                                              |                                   |
| Contig gap                               |               |                    |                        |               |                                  |                          |                                                                                                        |                |                          |                                         |            |           |                                                                                                                                                                                                            |                                              |                                   |
| GD-ORF44                                 | MDP0000120847 | 11456001..11457698 | ↓                      | MDC003279.119 | 11452931..11466541               | CBL94161                 | Putative protein with Heavy Metal Associated (HMA) domain                                              | 0.0            |                          |                                         |            |           |                                                                                                                                                                                                            | ORF33                                        |                                   |
| GD-ORF45                                 | MDP0000286768 | 11458537..11466416 | ↑                      | MDC003279.119 | 11452931..11466541               | CBL94162                 | putative transducin family protein / WD-40 repeat family protein                                       | 0.0            |                          |                                         |            |           |                                                                                                                                                                                                            | ORF34                                        |                                   |

The arrows indicate the 5'→3' direction. \*The gene sequences are identical. \*\*The gene sequences are identical except for a Y (C/T) indicating a SNP among the two GD alleles. In black are highlighted the gap positions between contigs; in dark gray the SSR markers positions and in light gray the BAC ends positions.
