# Supplementary material for: Genomic organisation of the Mal d 1 gene cluster on linkage group 16 in apple
Source: PubMed Central journal article supplement — Mol Breed. 2011 Jun 24;29(3):759–78. doi: 10.1007/s11032-011-9588-4 (PMC3285766; doi:10.1007/s11032-011-9588-4), 2011-06-24
Supplement: 11032_2011_9588_MOESM8_ESM.pdf [file 11032_2011_9588_MOESM8_ESM.pdf]

| ORF          | Malus domestica glaberrima wide analysis |                    |           |            |                               | BLASTP results     |                          |                             | BLASTN results |                          |                                                                | Features of new genes |           |            | Note | Mal d f locus | Nomenclature in Yang et al., 2011    | Notes                                                |                  |             |                                                                                                                                                                                                                                                                                                                                         |  |
|--------------|------------------------------------------|--------------------|-----------|------------|-------------------------------|--------------------|--------------------------|-----------------------------|----------------|--------------------------|----------------------------------------------------------------|-----------------------|-----------|------------|------|---------------|--------------------------------------|------------------------------------------------------|------------------|-------------|-----------------------------------------------------------------------------------------------------------------------------------------------------------------------------------------------------------------------------------------------------------------------------------------------------------------------------------------|--|
|              | Gene name on the chromosome              | Gene position      | Direction | Chromosome | Contig name on the chromosome | Contig position    | Most similar sequence ID | Description                 | E-value        | Most similar sequence ID | Description                                                    | SNP in CDS            | E-value   | Identities |      |               |                                      |                                                      | Full length (nt) | CDS (nt)    | Intron/exon (nt)                                                                                                                                                                                                                                                                                                                        |  |
| GD-ORF46     | MDP000031518                             | 5630779..5631258   | ↑         | 1          | MDC01848.391                  | 5629453..5630502   | AAS00050                 | Mal d 1-like                | 3.00E-80       | AY822729                 | Mal d 1.03E02                                                  | 19                    | 0.0       | 95%        | 480  | 480           | Intorless                            | New                                                  | Mal d 1.03J      | Mal d 1.07B | Re-named in this paper Mal d 1.03J because more similar to Mal d 1.03K and Mal d 1.03D at the nucleotide level (95%)                                                                                                                                                                                                                    |  |
| GD-ORF47     | MDP000031519                             | 9634541..9635020   | ↑         | 1          | MDC01848.391                  | 5629453..5630502   | AAS00049                 | Mal d 1-like                | 2.00E-82       | AY822728                 | Mal d 1.03E02                                                  | 17                    | 0.0       | 96%        | 480  | 480           | Intorless                            | New                                                  | Mal d 1.03K      | Mal d 1.07C | Re-named in this paper Mal d 1.03K because more similar to Mal d 1.03D (95% the nt sequence and 95.6% the aa sequence)                                                                                                                                                                                                                  |  |
| GDp001012    |                                          |                    |           | 1          | MDC009910.304                 | 5284524..5284634   |                          |                             |                |                          |                                                                |                       |           |            |      |               |                                      |                                                      |                  |             |                                                                                                                                                                                                                                                                                                                                         |  |
| GD-ORF48     | MDP000034722                             | 18633224..18633695 | ↓         | 4          | MDC019649.418                 | 18633177..18644646 | AAH18306                 | major allergen Mal d 1.06C  | 4.00E-57       | AY827729                 | Mal d 1.06C                                                    | 1                     | 0.0       | 99%        |      |               |                                      | Pseudogene, identical to MDP0000287647               | Mal d 1.06C      | absent      |                                                                                                                                                                                                                                                                                                                                         |  |
| GDp001089    |                                          |                    |           | 4          | MDC002726.126                 | 16377398..16377769 |                          |                             |                |                          |                                                                |                       |           |            |      |               |                                      |                                                      |                  |             |                                                                                                                                                                                                                                                                                                                                         |  |
| H08b03       |                                          |                    |           | 6          | MDC002407.853                 | 5746854..5772074   |                          |                             |                |                          |                                                                |                       |           |            |      |               |                                      |                                                      |                  |             |                                                                                                                                                                                                                                                                                                                                         |  |
| GDp002783    |                                          |                    |           | 6          | MDC004656.32                  | 9847772..9847772   |                          |                             |                |                          |                                                                |                       |           |            |      |               |                                      |                                                      |                  |             |                                                                                                                                                                                                                                                                                                                                         |  |
| GD-ORF49     | MDP0000149794*                           | 9828373..9828974   | ↑         | 6          | MDC01919.136                  | 9827677..9838304   | AAH18295                 | major allergen Mal d 1.0501 | 4.00E-86       | AY827882                 | Mal d 1.0501                                                   | 0                     | 3.00E-155 | 100%       |      |               |                                      | Identical to MDP0000276353                           | Mal d 1.05       | Mal d 1.05A | After this paper the name Mal d 1.05 assigned by Gao et al. (2006) has been kept because we decided to delay the assignment of different names to all the duplicated genes till their existence has been validated and assembly errors have been ruled out                                                                              |  |
| GD-ORF50     | MDP0000276353*                           | 9836193..9836794   | ↓         | 6          | MDC005357.463                 | 9831882..9838652   | AAH18295                 | major allergen Mal d 1.0501 | 4.00E-86       | AY827882                 | Mal d 1.0501                                                   | 0                     | 3.00E-155 | 100%       |      |               |                                      | Identical to MDP0000149794                           | Mal d 1.05       | Mal d 1.05B |                                                                                                                                                                                                                                                                                                                                         |  |
| GD-ORF51     | MDP0000220042                            | 15075156..15075738 | ↑         | 6          | MDC010733.630                 | 15074064..15091439 |                          | No significant similarities |                | AY822730                 | Mal d 1.03E01                                                  | 29                    | 4.00E-55  | 91%        |      |               |                                      | New pseudogene                                       | Mal d 1.05D      | absent      |                                                                                                                                                                                                                                                                                                                                         |  |
| CN443296-SSR |                                          |                    |           | 6          | MDC006296.539                 | 21046202..21029361 |                          |                             |                |                          |                                                                |                       |           |            |      |               |                                      |                                                      |                  |             |                                                                                                                                                                                                                                                                                                                                         |  |
| GD-ORF52     | MDP0000212506*                           | 24291156..24291818 | ↑         | 6          | MDC016519.264                 | 24287963..24294012 | AAS00053                 | Mal d 1-like                | 2.00E-89       | FN823234                 | Mal d 1.1101                                                   | 19                    | 1.00E-135 | 96%        | 663  | 492           | Exon 1184; Intron: 171; Exon II: 308 | New, identical to MDP0000287647                      | Mal d 1.11B      | absent      |                                                                                                                                                                                                                                                                                                                                         |  |
| NH300b       |                                          |                    |           | 13         | MDC003881.206                 | 12110844..12110811 |                          |                             |                |                          |                                                                |                       |           |            |      |               |                                      |                                                      |                  |             |                                                                                                                                                                                                                                                                                                                                         |  |
| GD-ORF53     | MDP0000293311*                           | 14463513..14463992 | ↓         | 13         | MDC012816.264                 | 14462024..14465502 | AAH18314                 | major allergen Mal d 1.03B  | 2.00E-84       | AY822724                 | Mal d 1.03B02                                                  | 1                     | 0.0       | 99%        | 480  | 480           | Intorless                            | New, identical to MDP0000265460                      | Mal d 1.03B      | Mal d 1.03B |                                                                                                                                                                                                                                                                                                                                         |  |
| GD-ORF54     | MDP000027820*                            | 14465029..14465508 | ↑         | 13         | MDC012816.264                 | 14462024..14465502 | AAH18317                 | major allergen Mal d 1.03D  | 2.00E-85       | AY822728                 | Mal d 1.03D02                                                  | 0                     | 0.0       | 100%       | 480  | 480           | Intorless                            | New, identical to MDP000014309                       | Mal d 1.03D      | Mal d 1.03D |                                                                                                                                                                                                                                                                                                                                         |  |
| GD-ORF55     | MDP0000295540*                           | 14469119..14469598 | ↓         | 13         | MDC012816.382                 | 14461566..14465578 | AAH18314                 | major allergen Mal d 1.03B  | 3.00E-85       | AY822724                 | Mal d 1.03B02                                                  | 1                     | 0.0       | 99%        | 480  | 480           | Intorless                            | New, identical to MDP0000293311                      | Mal d 1.03B      | Mal d 1.03B |                                                                                                                                                                                                                                                                                                                                         |  |
| GD-ORF56     | MDP0000295642                            | 14475691..14476170 | ↓         | 13         | MDC012816.382                 | 14461566..14465578 | AAH18313                 | major allergen Mal d 1.03A  | 2.00E-83       | AY822722                 | Mal d 1.03A01                                                  | 2                     | 0.0       | 99%        | 480  | 480           | Intorless                            | Identical to MDP0000293311                           | Mal d 1.03A      | Mal d 1.03A |                                                                                                                                                                                                                                                                                                                                         |  |
| GD-ORF57     | MDP0000295643                            | 14478900..14479379 | ↓         | 13         | MDC012816.382                 | 14461566..14465578 | AAS00048                 | Mal d 1-like                | 1.00E-84       | AY822730                 | Mal d 1.03E01                                                  | 0                     | 0.0       | 100%       |      |               |                                      | New, identical to MDP000027820                       | Mal d 1.03E      | Mal d 1.03E |                                                                                                                                                                                                                                                                                                                                         |  |
| GD-ORF58     | MDP0000814339*                           | 14482284..14482763 | ↓         | 13         | MDC012816.382                 | 14461566..14465578 | AAH18317                 | major allergen Mal d 1.03D  | 2.00E-85       | AY822728                 | Mal d 1.03D02                                                  | 0                     | 0.0       | 100%       | 480  | 480           | Intorless                            | New, identical to MDP000027820                       | Mal d 1.03D      | Mal d 1.03D |                                                                                                                                                                                                                                                                                                                                         |  |
| GD-ORF59     | MDP000065694                             | 14485052..14485492 | ↑         | 13         | MDC038217                     | 14484790..14488692 | AAH18323                 | major allergen Mal d 1.03F  | 4.00E-71       | AY822732                 | Mal d 1.03F02                                                  | 1                     | 0.0       | 99%        |      |               |                                      | Identical to MDP000030380 but missing the last 42 bp | Mal d 1.03F      | absent      |                                                                                                                                                                                                                                                                                                                                         |  |
| sp1401       |                                          |                    |           | 13         | MDC038217                     | 14484790..14488692 |                          |                             |                |                          |                                                                |                       |           |            |      |               |                                      |                                                      |                  |             |                                                                                                                                                                                                                                                                                                                                         |  |
| GD-ORF60     | MDP0000533638                            | 14489714..14489193 | ↑         | 13         | MDC010448.381                 | 14486870..14489163 | AAH18323                 | major allergen Mal d 1.03F  | 4.00E-71       | AY822732                 | Mal d 1.03F02                                                  | 0                     | 0.0       | 100%       |      |               |                                      | New pseudogene (ORF with stop codon)                 | Mal d 1.03F      | Mal d 1.03F |                                                                                                                                                                                                                                                                                                                                         |  |
| GD-ORF61     | MDP0000029029                            | 14493380..14493811 | ↓         | 13         | MDC012049.376                 | 14491854..14502293 | AAH18316                 | major allergen Mal d 1.03C  | 7.00E-71       | AY789266                 | Malus x domestica major allergen Mal d 1.03C                   | 25                    | 0.0       | 94%        |      |               |                                      |                                                      | Mal d 1.03E      | absent      |                                                                                                                                                                                                                                                                                                                                         |  |
| GD-ORF62     | MDP0000838523                            | 14496290..14496778 | ↑         | 13         | MDC001848.388                 | 14495277..14507772 | AAH20990                 | Mal d 1.06C05               | 2.00E-76       | AY822723                 | Malus x domestica clone 23110395 Mal d 1.02B01                 | 77                    | 3.00E-121 | 84%        | 480  | 480           | Intorless                            | New                                                  | Mal d 1.13D      | Mal d 1.12A | After this paper we named this sequence Mal d 1.13D because Yang et al. (2011) didn't consider in their nomenclature system that the genes Mal d 1.10 to Mal d 1.12 had already been assigned through a NCBI deposited and sequence (FN823234). Due to this all the names of the genes after Mal d 1.09 in Yang et al. (2011) are wrong |  |
| GD-ORF63     | MDP0000418277                            | 14499584..14500066 | ↓         | 13         | MDC001848.388                 | 14495277..14507772 | AAH21000                 | Mal d 1.02C02               | 2.00E-75       | AY822725                 | Mal d 1.02C02                                                  | 16                    | 0.0       | 95%        | 481  | 466           | Exon 1154; Intron: 16; Exon II: 351  | New                                                  | Mal d 1.03H      | absent      |                                                                                                                                                                                                                                                                                                                                         |  |
| GD-ORF64     | MDP0000750556                            | 14510427..14510906 | ↓         | 13         | MDC012049.250                 | 14510180..14511249 | AAH20990                 | Mal d 1.06C05               | 3.00E-78       | AY428583                 | Malus x domestica clone 1h Mal d 1-like                        | 47                    | 9.00E-176 | 91%        | 480  | 480           | Intorless                            | New                                                  | Mal d 1.13C      | Mal d 1.12D | See the note for Mal d 1.13D                                                                                                                                                                                                                                                                                                            |  |
| GD-ORF65     | MDP0000280110                            | 14514476..14514955 | ↓         | 13         | MDC012049.377                 | 14513008..14518545 | AAH20990                 | Mal d 1.06C05               | 7.00E-78       | AY428582                 | Malus x domestica clone 1g Mal d 1-like                        | 46                    | 5.00E-178 | 91%        | 480  | 480           | Intorless                            | New                                                  | Mal d 1.13B      | Mal d 1.12C | See the note for Mal d 1.13D                                                                                                                                                                                                                                                                                                            |  |
| GD-ORF66     | MDP0000195610                            | 14522438..14523031 | ↓         | 13         | MDC012049.378                 | 14518545..14538765 | AAH20990                 | Mal d 1.06C05               | 6.00E-76       | AM828501                 | Malus x domestica mal d 1.06A gene for PR-10 protein, alias 02 | 40                    | 3.00E-111 | 91%        | 594  | 480           | Exon 1184; Intron: 114; Exon II: 296 | New                                                  | Mal d 1.14       | Mal d 1.11  | See the note for Mal d 1.13D                                                                                                                                                                                                                                                                                                            |  |
| GD-ORF67     | MDP000061199                             | 14526222..14526701 | ↑         | 13         | MDC012049.378                 | 14518545..14538765 | AAH18316                 | major allergen Mal d 1.03C  | 1.00E-85       | AY789266                 | Mal d 1.03C01                                                  | 0                     | 0.0       | 100%       |      |               |                                      | New                                                  | Mal d 1.03C      | absent      |                                                                                                                                                                                                                                                                                                                                         |  |
| GD-ORF68     | MDP0000611200                            | 14530490..14530969 | ↑         | 13         | MDC012049.378                 | 14518545..14538765 | AAH20989                 | Mal d 1.06C04               | 9.00E-78       | AY428580                 | Malus x domestica clone 1e Mal d 1-like                        | 48                    | 5.00E-173 | 90%        | 480  | 480           | Intorless                            | New                                                  | Mal d 1.13A      | Mal d 1.12B | See the note for Mal d 1.13D                                                                                                                                                                                                                                                                                                            |  |
| GD-ORF69     | MDP0000195614                            | 14533927..14534406 | ↑         | 13         | MDC012049.378                 | 14518545..14538765 | AAH18316                 | major allergen Mal d 1.03C  | 4.00E-84       | AY789266                 | Mal d 1.03C01                                                  | 8                     | 0.0       | 97%        |      |               |                                      | New                                                  | Mal d 1.03D      | Mal d 1.03C |                                                                                                                                                                                                                                                                                                                                         |  |
| GD-ORF70     | MDP0000103627*                           | 14568759..14569403 | ↓         | 13         | MDC00415.584                  | 14567331..14568768 | AAH18286                 | major allergen Mal d 1.01   | 2.00E-86       | AY827644                 | Mal d 1.0105.04                                                | 0                     | 0.0       | 100%       |      |               |                                      | Identical to MDP0000195621                           | Mal d 1.01       | Mal d 1.01  |                                                                                                                                                                                                                                                                                                                                         |  |
| GD-ORF71     | MDP0000103621*                           | 14568761..14568826 | ↑         | 13         | MDC01015.337                  | 14568773..14569085 | AAH18286                 | major allergen Mal d 1.01   | 2.00E-86       | AY827644                 | Mal d 1.0105.04                                                | 0                     | 0.0       | 100%       |      |               |                                      | Identical to MDP0000195622                           | Mal d 1.01       | Mal d 1.01  |                                                                                                                                                                                                                                                                                                                                         |  |
| GD-ORF72     | MDP0000306438                            | 14589138..14589307 | ↑         | 13         | MDC01015.337                  | 14568773..14569085 |                          | No significant similarities |                | AY827644                 | Mal d 1.0105.04                                                | 0                     | 1.00E-80  | 100%       |      |               |                                      | Partial (only exon I)                                | Mal d 1.01       | absent      |                                                                                                                                                                                                                                                                                                                                         |  |
| GD-ORF73     | MDP0000203193*                           | 14597190..14597852 | ↓         | 13         | MDC004201.204                 | 14595861..14600843 | AAS00053                 | Mal d 1-like                | 2.00E-89       | FN823234                 | Mal d 1.1101                                                   | 19                    | 1.00E-135 | 96%        | 663  | 492           | Exon 1184; Intron: 171; Exon II: 308 | New, identical to MDP0000212506                      | Mal d 1.11B      | absent      |                                                                                                                                                                                                                                                                                                                                         |  |
| H03E04       |                                          |                    |           | 13         | MDC048175.12                  | 16026056..16037076 |                          |                             |                |                          |                                                                |                       |           |            |      |               |                                      |                                                      |                  |             |                                                                                                                                                                                                                                                                                                                                         |  |

The arrows indicate the 5'→3' direction. The gene names with the same symbol in superscript ( \* ) are identical. The positions of SSR markers are highlighted in gray. The putative new Mal d f genes are highlighted in black.
