# Supplementary material for: Genomic organisation of the Mal d 1 gene cluster on linkage group 16 in apple
Source: PubMed Central journal article supplement — Mol Breed. 2011 Jun 24;29(3):759–78. doi: 10.1007/s11032-011-9588-4 (PMC3285766; doi:10.1007/s11032-011-9588-4), 2011-06-24
Supplement: 11032_2011_9588_MOESM10_ESM.pdf [file 11032_2011_9588_MOESM10_ESM.pdf]

## BLAST results

| ORF    | Position on scaffold 1 | Direction | Accession number of the similarest sequence | E-value          | Description                                                         | Source                                        | Nucleotide sequences identities | Amino acid sequences identities | Conserved domain                                                                            | Pru p 1 isoallergen* | Nomenclature in Yang et al., 2011 | Notes                                                                                                                                              |
|--------|------------------------|-----------|---------------------------------------------|------------------|---------------------------------------------------------------------|-----------------------------------------------|---------------------------------|---------------------------------|---------------------------------------------------------------------------------------------|----------------------|-----------------------------------|----------------------------------------------------------------------------------------------------------------------------------------------------|
| pORF1  | 9457845..9468256       | ↓         | XP_002519184                                | 0.0              | Conserved hypothetical protein                                      | <i>Ricinus communis</i>                       |                                 |                                 | FAR1 DNA-binding domain; MULE transposase domain; plant mutator transposase zinc finger     |                      |                                   |                                                                                                                                                    |
| pORF2  | 9473908..9474506       | ↓         | XP_002519177                                | 7.00E-47         | GATA transcription factor, putative                                 | <i>Ricinus communis</i>                       |                                 |                                 |                                                                                             |                      |                                   |                                                                                                                                                    |
| pORF3  | 9477268..9478482       | ↓         | ABJ96377                                    | 1.00E-68         | Hypothetical protein                                                | <i>Prunus persica</i>                         |                                 |                                 |                                                                                             |                      |                                   |                                                                                                                                                    |
| pORF4  | 9492742..9495502       | ↓         | XP_002519175                                | 0.0              | Protein COBRA precursor, putative                                   | <i>Ricinus communis</i>                       |                                 |                                 | COBRA-like (COBL) proteins                                                                  |                      |                                   |                                                                                                                                                    |
| pORF5  | 9497081..9505718       | ↑         | XP_002519174                                | 3.00E-152        | Sensor histidine kinase, putative                                   | <i>Ricinus communis</i>                       |                                 |                                 | REC, Signal receiver domain                                                                 |                      |                                   |                                                                                                                                                    |
| pORF6  | 9507812..9508966       | ↓         | XP_002282861                                | 2.00E-62         | Hypothetical protein isoform 2                                      | <i>Vitis vinifera</i>                         |                                 |                                 |                                                                                             |                      |                                   |                                                                                                                                                    |
| pORF7  | 9511021..9513200       | ↓         | XP_002519173                                | 2.00E-45         | Drought-induced protein D19-like protein                            | <i>Arabidopsis thaliana</i>                   |                                 |                                 | Drought induced 19 protein (Dri19)                                                          |                      |                                   |                                                                                                                                                    |
| pORF8  | 9521977..9524246       | ↑         | XP_002271465                                | 4.00E-73         | Hypothetical protein                                                | <i>Vitis vinifera</i>                         |                                 |                                 |                                                                                             |                      |                                   |                                                                                                                                                    |
| pORF9  | 9528048..9528658       | ↑         | <b>EU424246</b>                             | <b>0.0</b>       | <b>Prunus dulcis x Prunus persica putative allergen Pru p 1.04</b>  | <b><i>Prunus dulcis x Prunus persica</i></b>  | <b>622/622 (100%)</b>           | <b>159/159 (100%)</b>           | Polyketide cyclase / dehydrase and lipid transport                                          | <b>Pru p 1.04</b>    | <b>Pru p 1.04</b>                 |                                                                                                                                                    |
| pORF10 | 9533326..9533754       | ↓         | <b>AY540509</b>                             | <b>1.00E-144</b> | <b>Prunus avium major cherry allergen Pru av 1.0203 mRNA</b>        | <b><i>Prunus avium</i></b>                    | <b>424/491 (86%)</b>            | <b>128/160 (80%)</b>            | Polyketide cyclase / dehydrase and lipid transport                                          | <b>Pru p 1.08</b>    | <b>Pru p 1.06F</b>                | After this paper this gene was re-named as <i>Pru p 1.08</i> because the nucleotide similarity with others <i>Pru p 1.06</i> CDSs is less than 95% |
| pORF11 | 9535128..9535640       | ↑         | <b>EU424248</b>                             | <b>0.0</b>       | <b>Prunus dulcis x Prunus persica putative allergen Pru p 1.05</b>  | <b><i>Prunus dulcis x Prunus persica</i></b>  | <b>527/576 (91%)</b>            | <b>135/149 (90%)</b>            | Polyketide cyclase / dehydrase and lipid transport                                          | <b>Pru p 1.09</b>    | <b>absent</b>                     | New                                                                                                                                                |
| pORF12 | 9536323..9536918       | ↓         | <b>EU424252</b>                             | <b>0.0</b>       | <b>Prunus dulcis x Prunus persica putative allergen Pru p 1.06A</b> | <b><i>Prunus dulcis x Prunus persica</i></b>  | <b>602/617 (97%)</b>            | <b>155/160 (96%)</b>            | Polyketide cyclase / dehydrase and lipid transport                                          | <b>Pru p 1.06F</b>   | <b>absent</b>                     | New                                                                                                                                                |
| pORF13 | 9539456..9546755       | ↓         | ABA96037                                    | 2.00E-73         | Retrotransposon protein, putative, Ty3-gypsy subclass               | <i>Oryza sativa (japonica cultivar-group)</i> |                                 |                                 | RT_LTR (Reverse transcriptases from retrotransposons); retropepsin-like aspartate proteases |                      |                                   |                                                                                                                                                    |
| pORF14 | 9548440..9549057       | ↑         | <b>EU424248</b>                             | <b>0.0</b>       | <b>Prunus dulcis x Prunus persica putative allergen Pru p 1.05</b>  | <b><i>Prunus dulcis x Prunus persica</i></b>  | <b>618/618 (100%)</b>           | <b>160/160 (100%)</b>           | Polyketide cyclase / dehydrase and lipid transport                                          | <b>Pru p 1.05</b>    | <b>Pru p 1.05</b>                 | Identical to pORF23                                                                                                                                |
| pORF15 | 9550585..9551176       | ↓         | <b>EU424253</b>                             | <b>0.0</b>       | <b>Prunus dulcis x Prunus persica putative allergen Pru p 1.06C</b> | <b><i>Prunus dulcis x Prunus persica</i></b>  | <b>1108/1109 (99%)</b>          | <b>160/160 (100%)</b>           | Polyketide cyclase / dehydrase and lipid transport                                          | <b>Pru p 1.06C</b>   | <b>Pru p 1.06C</b>                |                                                                                                                                                    |
| pORF16 | 9554651..9555255       | ↓         | <b>EU424245</b>                             | <b>0.0</b>       | <b>Prunus dulcis x Prunus persica putative allergen Pru du 1.04</b> | <b><i>Prunus dulcis x Prunus persica</i></b>  | <b>615/615 (100%)</b>           | <b>159/159 (100%)</b>           | Polyketide cyclase / dehydrase and lipid transport                                          | <b>Pru p 1.07</b>    | <b>absent</b>                     | Previously classified as the almond allele <i>Pru du 1.04</i> and after this paper re-named as <i>Pru p 1.07</i>                                   |
| pORF17 | 9558593..9559178       | ↑         | <b>EU424244</b>                             | <b>0.0</b>       | <b>Prunus dulcis x Prunus persica putative allergen Pru p 1.03</b>  | <b><i>Prunus dulcis x Prunus persica</i></b>  | <b>623/623 (100%)</b>           | <b>160/160 (100%)</b>           | Polyketide cyclase / dehydrase and lipid transport                                          | <b>Pru p 1.03</b>    | <b>Pru p 1.03</b>                 |                                                                                                                                                    |
| pORF18 | 9560832..9561420       | ↓         | <b>EU424250</b>                             | <b>0.0</b>       | <b>Prunus dulcis x Prunus persica putative allergen Pru p 1.06B</b> | <b><i>Prunus dulcis x Prunus persica</i></b>  | <b>586/588 (99%)</b>            | <b>160/160 (100%)</b>           | Polyketide cyclase / dehydrase and lipid transport                                          | <b>Pru p 1.06B</b>   | <b>Pru p 1.06B</b>                |                                                                                                                                                    |
| pORF19 | 9565786..9566378       | ↓         | <b>EU424252</b>                             | <b>0.0</b>       | <b>Prunus dulcis x Prunus persica putative allergen Pru p 1.06A</b> | <b><i>Prunus dulcis x Prunus persica</i></b>  | <b>681/690 (98%)</b>            | <b>157/160 (98%)</b>            | Polyketide cyclase / dehydrase and lipid transport                                          | <b>Pru p 1.06D</b>   | <b>Pru p 1.06D</b>                |                                                                                                                                                    |
| pORF20 | 9566736..9569689       | ↑         | XP_002528040                                | 2.00E-45         | Oxidoreductase, putative                                            | <i>Ricinus communis</i>                       |                                 |                                 |                                                                                             |                      |                                   |                                                                                                                                                    |
| pORF21 | 9572416..9572710       | ↑         | <b>EU424248</b>                             | <b>2.00E-80</b>  | <b>Prunus dulcis x Prunus persica putative allergen Pru p 1.05</b>  | <b><i>Prunus dulcis x Prunus persica</i></b>  | <b>207/224 (92%)</b>            |                                 | pseudogene                                                                                  |                      |                                   |                                                                                                                                                    |
| pORF22 | 9574073..9574665       | ↑         | <b>EU424252</b>                             | <b>0.0</b>       | <b>Prunus dulcis x Prunus persica putative allergen Pru p 1.06A</b> | <b><i>Prunus dulcis x Prunus persica</i></b>  | <b>868/868 (100%)</b>           | <b>160/160 (100%)</b>           | Polyketide cyclase / dehydrase and lipid transport                                          | <b>Pru p 1.06A</b>   | <b>Pru p 1.06A</b>                |                                                                                                                                                    |
| pORF23 | 9576054..9576692       | ↓         | <b>EU424248</b>                             | <b>0.0</b>       | <b>Prunus dulcis x Prunus persica putative allergen Pru p 1.05</b>  | <b><i>Prunus dulcis x Prunus persica</i></b>  | <b>678/679 (99%)</b>            | <b>160/160 (100%)</b>           | Polyketide cyclase / dehydrase and lipid transport                                          | <b>Pru p 1.05</b>    | <b>Pru p 1.05</b>                 | Identical to pORF14                                                                                                                                |
| pORF24 | 9580182..9584686       |           | AAM08562                                    | 6.00E-34         | Putative retroelement                                               | <i>Oryza sativa (japonica cultivar-group)</i> |                                 |                                 |                                                                                             |                      |                                   |                                                                                                                                                    |
| pORF25 | 9585782..9586368       | ↑         | <b>EU424252</b>                             | <b>0.0</b>       | <b>Prunus dulcis x Prunus persica putative allergen Pru p 1.06A</b> | <b><i>Prunus dulcis x Prunus persica</i></b>  | <b>638/666 (95%)</b>            | <b>154/160 (96%)</b>            | Polyketide cyclase / dehydrase and lipid transport                                          | <b>Pru p 1.06E</b>   | <b>Pru p 1.06E</b>                |                                                                                                                                                    |
| pORF26 | 9586947..9587557       | ↓         | <b>EU424248</b>                             | <b>0.0</b>       | <b>Prunus dulcis x Prunus persica putative allergen Pru p 1.05</b>  | <b><i>Prunus dulcis x Prunus persica</i></b>  | <b>568/619 (91%)</b>            |                                 | pseudogene                                                                                  |                      |                                   |                                                                                                                                                    |
| pORF27 | 9591486..9592192       | ↓         | <b>EU424240</b>                             | <b>0.0</b>       | <b>Prunus dulcis x Prunus persica putative allergen Pru p 1.02</b>  | <b><i>Prunus dulcis x Prunus persica</i></b>  | <b>762/762 (100%)</b>           | <b>160/160 (100%)</b>           | Polyketide cyclase / dehydrase and lipid transport                                          | <b>Pru p 1.02</b>    | <b>Pru p 1.02</b>                 |                                                                                                                                                    |
| pORF28 | 9596772..9597353       | ↓         | <b>EU424243</b>                             | <b>0.0</b>       | <b>Prunus dulcis x Prunus persica putative allergen Pru p 1.01</b>  | <b><i>Prunus dulcis x Prunus persica</i></b>  | <b>586/586 (100%)</b>           | <b>160/160 (100%)</b>           | Polyketide cyclase / dehydrase and lipid transport                                          | <b>Pru p 1.01</b>    | <b>Pru p 1.01</b>                 |                                                                                                                                                    |
| pORF29 | 9604229..9604885       | ↓         | <b>XM_002516942</b>                         | <b>2.00E-27</b>  | <b>Ricinus communis Major pollen allergen Car b 1 isoform</b>       | <b><i>Ricinus communis</i></b>                | <b>144/191 (75%)</b>            | <b>89/161 (55%)</b>             | Polyketide cyclase / dehydrase and lipid transport                                          | <b>Pru p 1.10*</b>   | <b>absent</b>                     | New                                                                                                                                                |
| pORF30 | 9606195..9606783       | ↓         | <b>AY428589</b>                             | <b>6.00E-100</b> | <b>Malus x domestica clone 1n Mal d 1-like mRNA</b>                 | <b><i>Malus x domestica</i></b>               | <b>290/332 (87%)</b>            | <b>143/162 (88%)</b>            | Polyketide cyclase / dehydrase and lipid transport                                          | <b>Pru p 1.11*</b>   | <b>absent</b>                     | New                                                                                                                                                |
| pORF31 | 9608398..9608998       | ↓         | <b>XM_002516941</b>                         | <b>1.00E-42</b>  | <b>Ricinus communis Major allergen Pru ar</b>                       | <b><i>Ricinus communis</i></b>                | <b>205/272 (75%)</b>            | <b>115/160 (71%)</b>            | Polyketide cyclase / dehydrase and lipid transport                                          | <b>Pru p 1.12*</b>   | <b>absent</b>                     | New                                                                                                                                                |
| pORF32 | 9609723..9612348       | ↓         | CANT9553                                    | 8.00E-75         | Hypothetical protein                                                | <i>Vitis vinifera</i>                         |                                 |                                 | Heavy-metal-associated domain (HMA)                                                         |                      |                                   |                                                                                                                                                    |
| pORF33 | 9613794..9618747       | ↑         | NP_196685                                   | 6.00E-53         | Transducin family protein / WD-40 repeat family protein             | <i>Arabidopsis thaliana</i>                   |                                 |                                 | WD40 domain                                                                                 |                      |                                   |                                                                                                                                                    |
| pORF34 | 9620828..9623355       | ↑         | ABA99544                                    | 6.00E-96         | Glycoside hydrolase family 28 protein, putative                     | <i>Oryza sativa (japonica cultivar-group)</i> |                                 |                                 | Glycosyl hydrolase family 28 includes polygalacturonase, polygalacturonase                  |                      |                                   |                                                                                                                                                    |
| pORF35 | 9628283..9635407       | ↑         | XP_002512473                                | 0.0              | WD-repeat protein, putative                                         | <i>Ricinus communis</i>                       |                                 |                                 | 2 WD40 domain                                                                               |                      |                                   |                                                                                                                                                    |
| pORF36 | 9643316..9648452       | ↓         | XP_002271110                                | 0.0              | Hypothetical protein                                                | <i>Vitis vinifera</i>                         |                                 |                                 | RNA-binding protein of the Puf family, transitional repressor                               |                      |                                   |                                                                                                                                                    |

\* The name for Pru p 1 isoallergen genes reported here for the first time were proposed following the official allergen nomenclature (King et al., 1995; Gao et al., 2005).
