# Supplementary figures and images for: Genomic organisation of the Mal d 1 gene cluster on linkage group 16 in apple
Source: PubMed Central journal article supplement — Mol Breed. 2011 Jun 24;29(3):759–78. doi: 10.1007/s11032-011-9588-4 (PMC3285766; doi:10.1007/s11032-011-9588-4), 2011-06-24

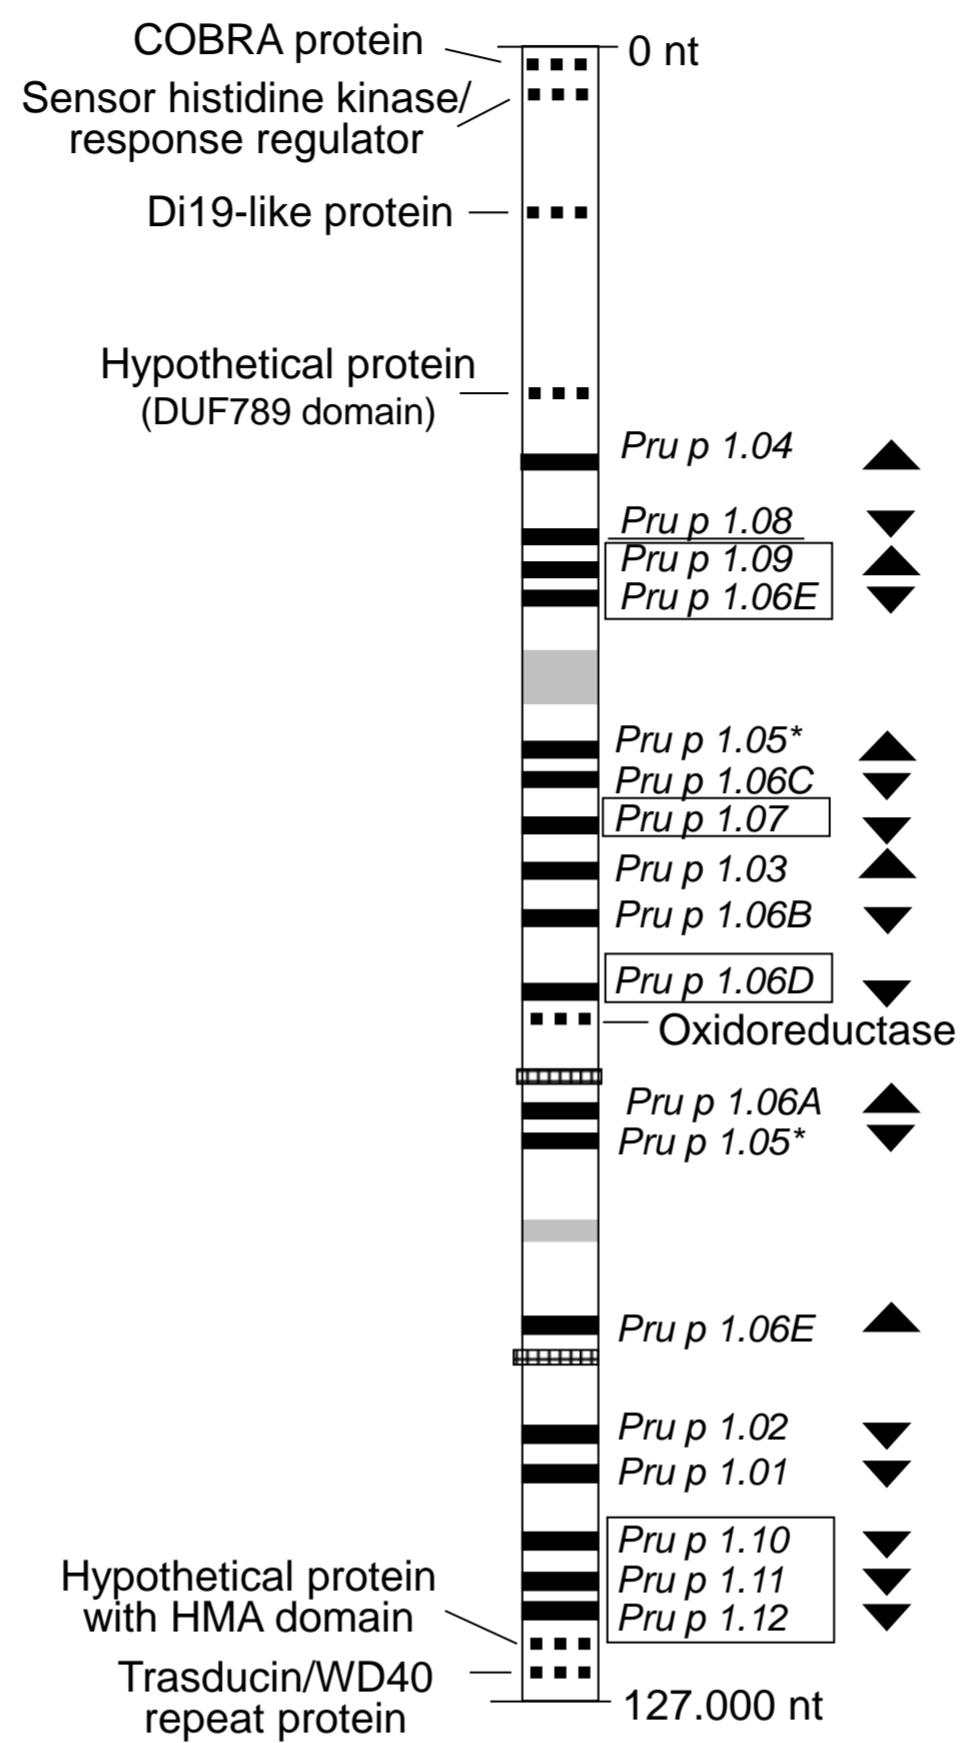

Supplement: 11032_2011_9588_MOESM11_ESM.pdf [file 11032_2011_9588_MOESM11_ESM.pdf]

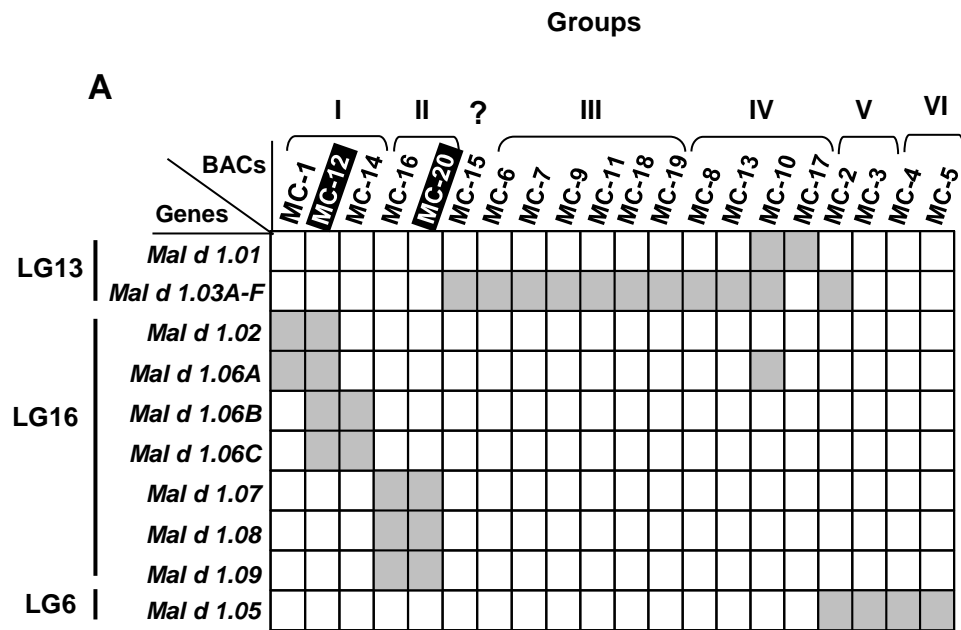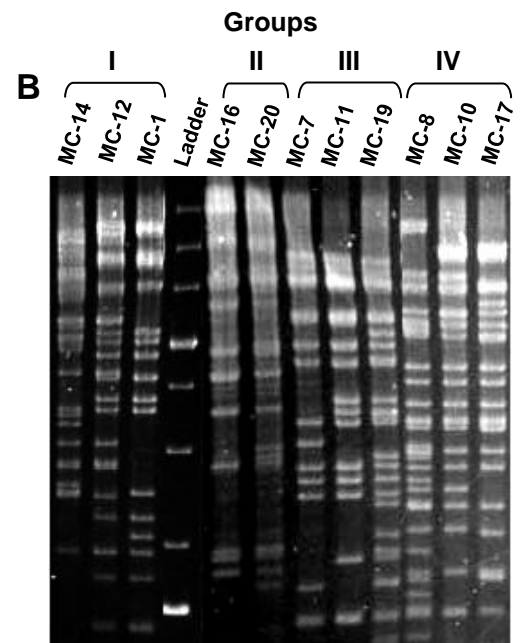

Supplement: 11032_2011_9588_MOESM5_ESM.pdf [file 11032_2011_9588_MOESM5_ESM.pdf]

**A**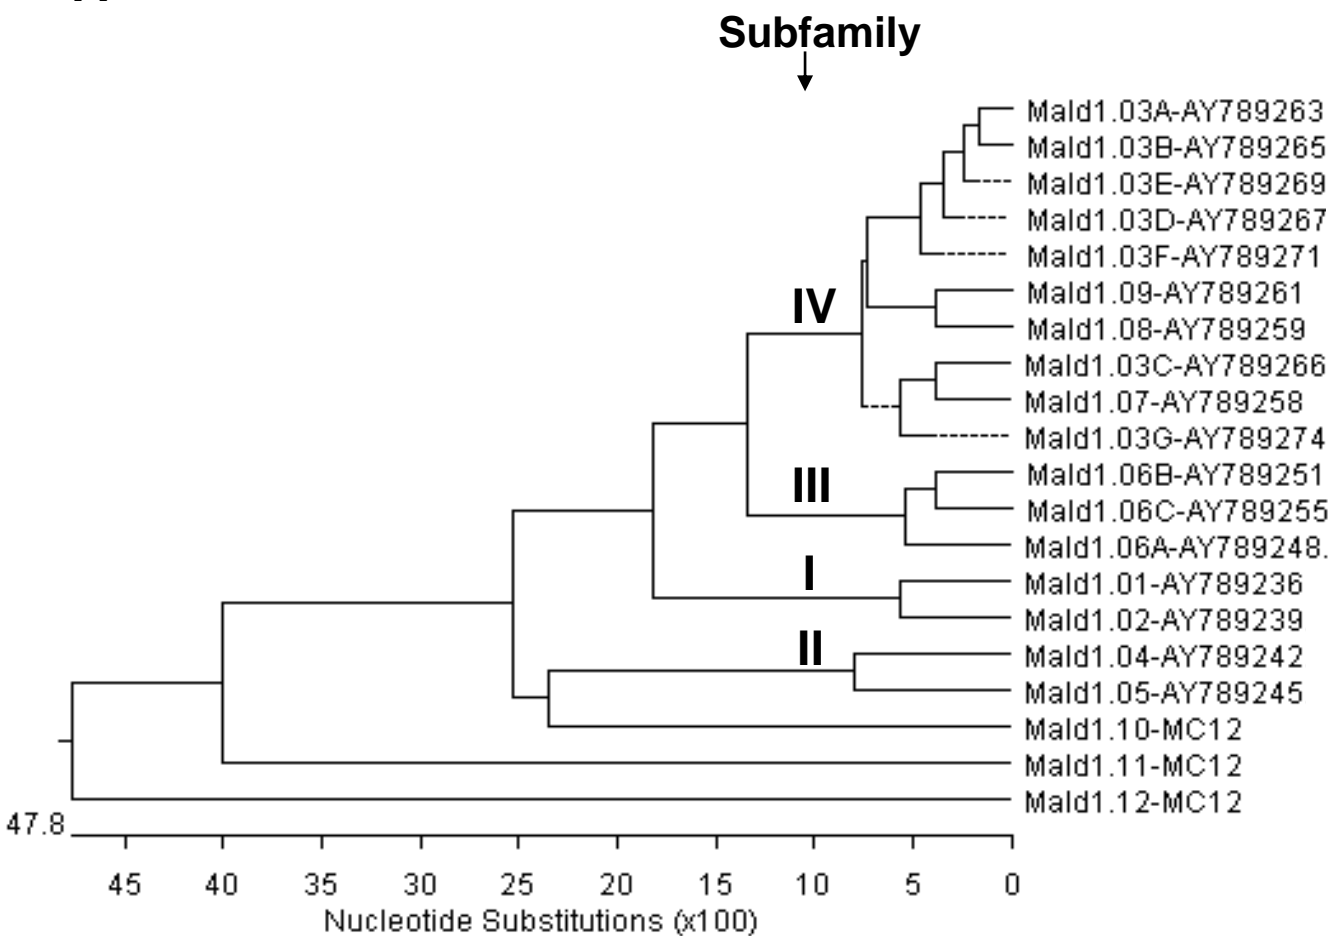**B**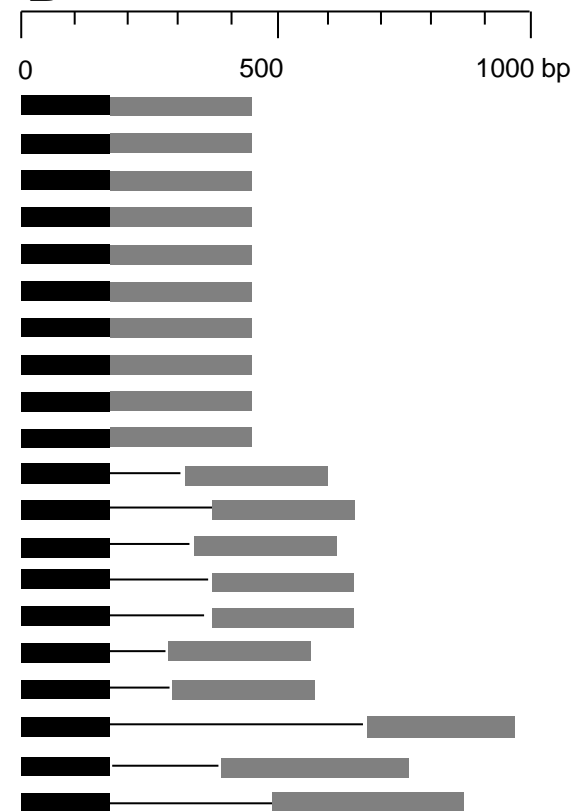

Supplement: 11032_2011_9588_MOESM6_ESM.pdf [file 11032_2011_9588_MOESM6_ESM.pdf]

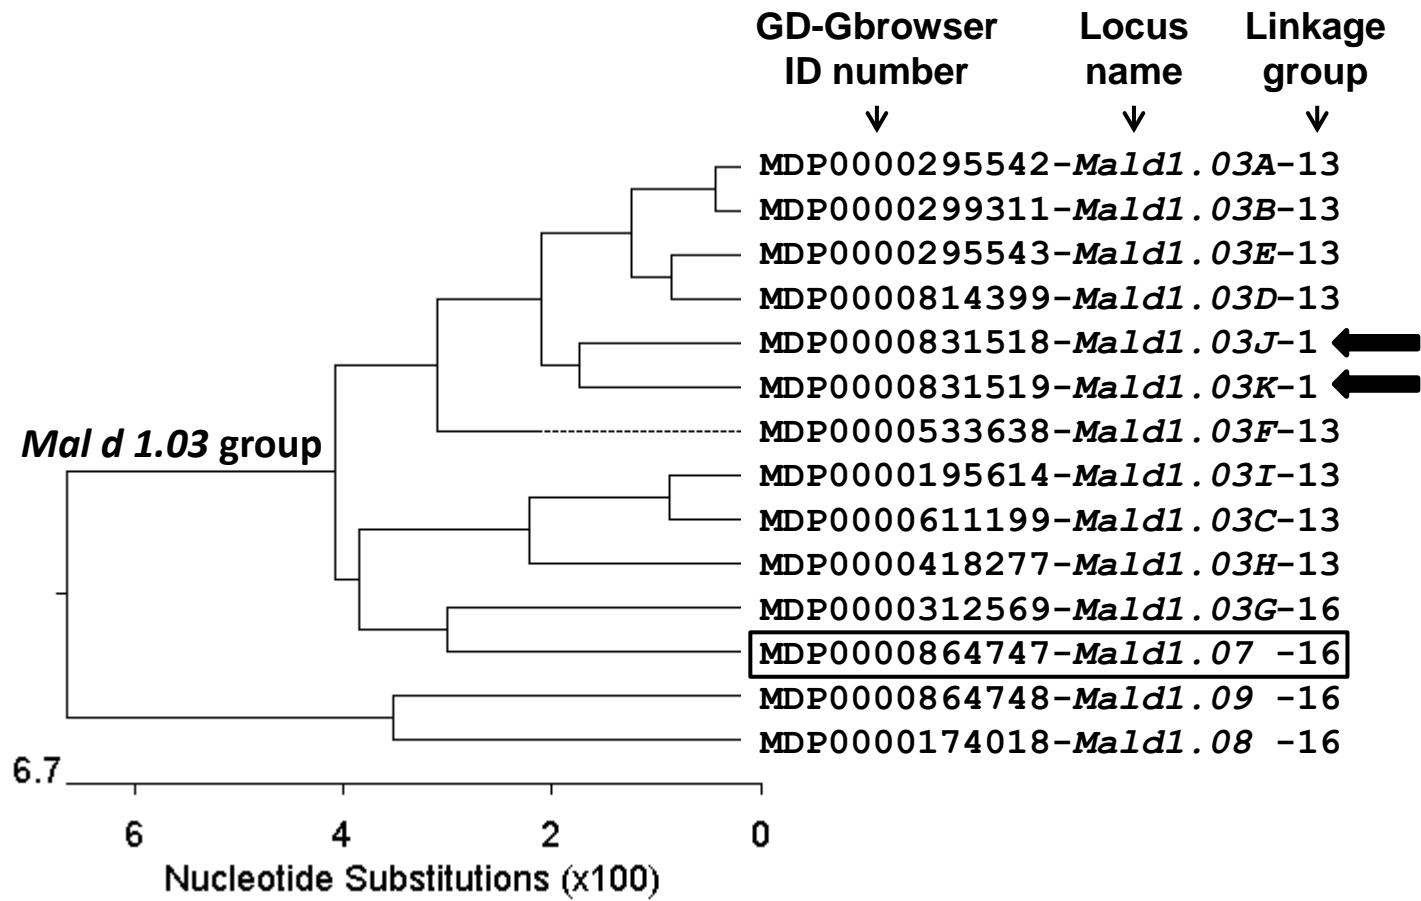

Supplement: 11032_2011_9588_MOESM9_ESM.pdf [file 11032_2011_9588_MOESM9_ESM.pdf]
